# Supplementary material
Source: PubMed Central journal article supplement (PMC8957488)
Supplement: NIHMS1765728-supplement-1.pdf [file NIHMS1765728-supplement-1.pdf]

1 **Supplementary Table 1. Summary of model parameters for drugs with efficacy against *M. kansasii*.**

| <b>DRUG</b>             | <b>E<sub>con</sub> (Log<sub>10</sub> CFU/mL)</b> | <b>E<sub>max</sub> (Log<sub>10</sub> CFU/mL)</b> | <b>EC<sub>50</sub> (mg/L)</b> | <b>Hill constant</b> |
|-------------------------|--------------------------------------------------|--------------------------------------------------|-------------------------------|----------------------|
| Isoniazid               | 8.18                                             | 4.26                                             | 0.88                          | 1.57                 |
| Rifampin                | 8.35                                             | 4.79                                             | 0.09                          | 2.68                 |
| Ethambutol              | 7.97                                             | 3.87                                             | 1.39                          | 1.46                 |
| Cefpodoxime + Avibactam | 6.26                                             | 1.45                                             | 3.53                          | 0.95                 |
| Cefdinir + Avibactam    | 6.63                                             | 5.13                                             | 12.09                         | 0.59                 |
| Tebipenem               | 7.19                                             | 7.19                                             | 0.21                          | 0.92                 |
| Tebipenem + Avibactam   | 7.25                                             | 7.25                                             | 0.07                          | 1.23                 |
| Clarithromycin          | 6.4                                              | 5.28                                             | 2.21                          | 0.49                 |
| Azithromycin            | 7.22                                             | 6.61                                             | 3.75                          | 1.09                 |
| Moxifloxacin            | 8.25                                             | 8.25                                             | 0.11                          | 1.21                 |
| Levofloxacin            | 6.02                                             | 6.02                                             | 0.57                          | 2.54                 |
| Minocycline             | 6.48                                             | 4.96                                             | 1.21                          | 1.01                 |
| Omadacycline            | 4.65                                             | 2.81                                             | 0.04                          | 3.02                 |
| Linezolid               | 5.62                                             | 3.96                                             | 2.17                          | 1.24                 |
| Tedizolid               | 7.32                                             | 7.32                                             | 0.43                          | 0.82                 |
| Bedaquiline             | 6.83                                             | 4.57                                             | 0.002                         | 0.41                 |
| Pretomanid              | 5.12                                             | 5.12                                             | 23.05                         | 1.55                 |
| Sulfamethoxazole        | 6.95                                             | 3.18                                             | 0.63                          | 5.18                 |
| Telacebac               | 5.72                                             | 5.72                                             | 0.36                          | 0.39                 |

2
